# Supplementary material
Source: ML conference proceedings conference paper supplement (https://aclanthology.org/D19-1374)
Supplement: Attachment [file D19-1374.Attachment.zip]

## A Detailed Hyperparameters

### A.1 Training Hyperparameters

We use exactly the same hyperparameters as the public multilingual BERT for finetuning our models. We train the part-of-speech tagging task for 10 epochs and the morphology task for 50 epochs.

For distillation, we use the following hyperparameters for all tasks.

- learning rate: 1e-4
- temperature: 3
- batch size: 256
- num epochs: 24

We take the Wikipedia pretraining data as is and drop sentences with fewer than 10 characters.

### A.2 Small BERT structure

We use the vocab and wordpiece model included with the cased public multilingual model on GitHub.

We use the BERT configuration of the public multilingual BERT with the following modifications for *mMiniBERT*.

- Hidden size = 256
- Intermediate layer size = 1024
- Num attention heads = 4
- Layers = 3

| Model            | Distilled | Part-of-Speech F1 | Morphology F1 |
|------------------|-----------|-------------------|---------------|
| <i>mBERT</i>     | No        | 94.5              | 91.0          |
| <i>mMiniBERT</i> | Yes       | 93.7              | 88.6          |
| <i>mMiniBERT</i> | No        | 90.2              | 85.5          |

Table 7: Ablation study to show the effect of distillation. The model without distillation has 3.5 points lower macro-averaged F1 on the part-of-speech task and 3.1 lower F1 on the morphology task.

## B Detailed Results

### B.1 The Importance of Distillation

To understand the importance of distillation in training *mMiniBERT*, we compare it to a model with the MiniBERT structure trained from scratch using only labeled multilingual data the teacher is trained on. Table 7 shows that distillation plays an important role in closing the accuracy gap between teacher and student.

### B.2 Per-Language Results

We show per-language F1 results of each model in Table 8 and Table 9. For per-language models, no models are trained for treebanks without tuning data, and metrics of those languages are not reported. All macro-averaged results reported exclude those languages.

| treebank     | BERT  | Meta-LSTM | mBERT | mMeta-LSTM | mMiniBERT |
|--------------|-------|-----------|-------|------------|-----------|
| af_afribooms | 97.62 | 97.63     | 97.49 | 93.16      | 96.08     |
| am_att       |       |           | 3.28  | 5.6        | 3.16      |
| ar_padt      | 90.46 | 90.55     | 90.32 | 89         | 90.06     |
| ar_pud       |       |           | 71.59 | 68.96      | 71.06     |
| be_hse       | 94.81 | 91.05     | 95.02 | 87.59      | 94.95     |
| bg_btb       | 99.01 | 98.77     | 98.72 | 96.43      | 98.19     |
| ca_ancora    | 98.84 | 98.62     | 98.77 | 97.57      | 98.45     |
| cs_cac       | 99.17 | 99.43     | 99.3  | 98.46      | 98.48     |
| cs_cltt      | 87.48 | 87.25     | 87.67 | 87.62      | 87.53     |
| cs_fictree   | 98.62 | 98.63     | 98.25 | 97.2       | 97.18     |
| cs_pdt       | 99.06 | 99.07     | 98.99 | 98.22      | 98.61     |
| cs_pud       |       |           | 97.13 | 96.53      | 97        |
| da_ddt       | 97.59 | 97.47     | 97.18 | 92.36      | 95.93     |
| de_gsd       | 94.81 | 94.17     | 94.53 | 91.94      | 93.82     |
| de_pud       |       |           | 88.76 | 87.42      | 88.7      |
| el_gdt       | 97.97 | 97.4      | 97.91 | 94.87      | 97.16     |
| en_ewt       | 95.82 | 95.45     | 95.2  | 92.24      | 94.19     |
| en_gum       | 96.22 | 95.02     | 94.79 | 92.33      | 94.24     |
| en_lines     | 97.22 | 96.81     | 95.79 | 93.96      | 95.25     |
| en_partut    | 96.11 | 95.9      | 95.02 | 93.29      | 94.61     |
| es_ancora    | 98.87 | 98.78     | 98.17 | 96.27      | 97.8      |
| es_gsd       | 93.7  | 93.9      | 89.65 | 90.61      | 89.58     |
| es_pud       |       |           | 85.87 | 86.1       | 85.71     |
| et_edt       | 97.27 | 97.17     | 97.02 | 94.32      | 95.64     |
| eu_bdt       | 96.2  | 96.1      | 95.51 | 91.53      | 94.15     |
| fa_seraji    | 97.57 | 97.17     | 97.17 | 95.29      | 96.92     |
| fi_ftb       | 96.26 | 96.12     | 93.15 | 87.23      | 89.79     |
| fi_pud       |       |           | 95.55 | 93.23      | 95.01     |
| fi_tdt       | 96.81 | 97.02     | 93.9  | 91.58      | 92.6      |
| fr_gsd       | 96.62 | 96.45     | 96.23 | 95.37      | 96.05     |
| fr_partut    | 96.18 | 96        | 95.43 | 94.35      | 94.93     |
| fr_pud       |       |           | 90.77 | 90.1       | 90.64     |
| fr_sequoia   | 96.77 | 97.59     | 97.07 | 95.91      | 96.75     |
| fr_spoken    | 97.55 | 95.78     | 96.1  | 90.07      | 93.25     |
| ga_idt       | 91.92 | 91.55     | 90.83 | 84.16      | 85.72     |
| gl_ctg       | 96.99 | 97.21     | 96.5  | 92.87      | 95.84     |
| gl_treegal   |       |           | 93.4  | 91.28      | 91.9      |
| he_htb       | 82.76 | 82.49     | 82.69 | 80.93      | 81.93     |
| hi_hdtb      | 97.31 | 97.39     | 97.1  | 96.2       | 96.43     |
| hi_pud       |       |           | 86.48 | 85.33      | 85.68     |
| hr_set       | 97.79 | 97.94     | 97.47 | 96.24      | 97.2      |
| hu_szeged    | 96.51 | 94.71     | 95.99 | 85.5       | 95.47     |
| hy_armtdp    | 84.42 |           | 86.62 | 63.82      | 86.98     |
| id_gsd       | 93.06 | 93.37     | 93.3  | 90.81      | 93.35     |
| id_pud       |       |           | 63.52 | 63.5       | 63.33     |
| it_isdt      | 98.33 | 98.06     | 98.27 | 96.7       | 97.8      |
| it_partut    | 98.12 | 98.17     | 98.09 | 96.99      | 98.06     |
| it_postwita  | 95.66 | 95.86     | 95.6  | 94.17      | 93.2      |
| it_pud       |       |           | 93.84 | 92.72      | 93.67     |

|                |       |       |       |       |       |
|----------------|-------|-------|-------|-------|-------|
| ja_gsd         | 88.63 | 88.73 | 88.54 | 87.03 | 88.43 |
| ja_modern      |       |       | 41.55 | 51.26 | 21.61 |
| ja_pud         |       |       | 89.15 | 87.96 | 89.3  |
| kk_ktb         | 75.93 | 61.7  | 81.36 | 52.91 | 80.06 |
| ko_gsd         | 95.92 | 95.64 | 90.3  | 86.39 | 88.62 |
| ko_kaist       | 95.56 | 95.42 | 93.86 | 87.46 | 93.43 |
| ko_pud         |       |       | 41.93 | 46.11 | 31.96 |
| la_ittb        | 98.34 | 98.42 | 98.3  | 97.18 | 97.65 |
| la_perseus     |       |       | 89.91 | 83.85 | 85.23 |
| la_proiel      | 96.34 | 96.37 | 95.97 | 92.02 | 93.78 |
| lt_hse         | 88.88 | 81.43 | 90.01 | 65.6  | 86.9  |
| lv_lvttb       | 94.79 | 94.47 | 93.71 | 88.25 | 91.3  |
| mr_ufal        | 77.45 | 72.1  | 75.92 | 65.48 | 75.41 |
| nl_alpino      | 97.1  | 96.16 | 97.33 | 93.78 | 96.19 |
| nl_lassysmall  | 95.54 | 95.92 | 95.72 | 94.4  | 95.47 |
| no_bokmaal     | 98    | 98    | 97.95 | 95.27 | 97.04 |
| no_nynorskliia |       |       | 94.08 | 88.27 | 92.55 |
| no_nynorsk     | 97.94 | 97.92 | 97.69 | 94.91 | 96.59 |
| pl_lfg         | 98.7  | 98.5  | 98.39 | 95.21 | 97.48 |
| pl_sz          | 98.56 | 97.91 | 98.05 | 94.73 | 97.29 |
| pt_bosque      | 96.74 | 96.73 | 96.16 | 95.53 | 95.85 |
| pt_gsd         | 95.83 | 95.44 | 93.84 | 93.07 | 94.44 |
| pt_pud         |       |       | 89.48 | 89.66 | 89.29 |
| ro_nonstandard | 94.67 | 94.48 | 94    | 92.05 | 91.9  |
| ro_rrt         | 97.63 | 97.52 | 97.47 | 95.78 | 96.71 |
| ru_gsd         | 92.23 | 91.39 | 90.84 | 88.13 | 90.14 |
| ru_pud         |       |       | 89.7  | 88.92 | 89.52 |
| ru_syntagrus   | 98.3  | 98.65 | 98.32 | 97.13 | 98.03 |
| ru_taiga       |       |       | 93.62 | 92.75 | 93.18 |
| sa_ufal        |       |       | 32.47 | 29.58 | 27.11 |
| sk_snk         | 97.08 | 96.32 | 96.98 | 93.61 | 96.35 |
| sl_ssja        | 97.07 | 96.68 | 96.89 | 94.24 | 95.58 |
| sl_sst         |       |       | 94.51 | 90.34 | 91.79 |
| sr_set         | 98.63 | 98.33 | 98.31 | 94.79 | 97.36 |
| sv_lines       | 97.21 | 96.59 | 96.99 | 93.64 | 95.57 |
| sv_pud         |       |       | 94.52 | 92.06 | 94.32 |
| sv_talbanken   | 98.03 | 97.34 | 97.77 | 94.91 | 96.76 |
| ta_ttb         | 75.71 | 72.7  | 74.28 | 61.51 | 74.6  |
| te_mtg         | 94.25 | 92.72 | 93.42 | 87.32 | 93.42 |
| th_pud         |       |       | 2.37  | 2.73  | 1.54  |
| tl_trg         |       |       | 70.69 | 28.62 | 68.28 |
| tr_imst        | 93.96 | 94.03 | 93.1  | 84.64 | 91.8  |
| tr_pud         |       |       | 73.1  | 68.36 | 72.47 |
| uk_iu          | 97.29 | 96.6  | 97.28 | 93    | 96.88 |
| ur_udtb        | 93.83 | 93.87 | 93.69 | 93    | 93.05 |
| vi_vtb         | 77.67 | 76.42 | 77.44 | 72.01 | 77.06 |
| yo_ytb         |       |       | 43.48 | 30.85 | 34.59 |
| zh_cfl         |       |       | 49.83 | 39.77 | 49.42 |
| zh_gsd         | 87.6  | 85.7  | 85.96 | 82.76 | 86.08 |
| zh_hk          |       |       | 66.29 | 57.88 | 65.86 |
| zh_pud         |       |       | 83.3  | 73.3  | 82.95 |

---

Table 8: POS tagging F1 of all models.

| treebank     | BERT F1 | Meta-LSTM F1 | mBERT F1 | mMeta-LSTM F1 | mMiniBERT F1 |
|--------------|---------|--------------|----------|---------------|--------------|
| af_afribooms | 97.11   | 97.36        | 96.53    | 88.98         | 93.75        |
| am_att       |         |              |          | 32.36         | 32.36        |
| ar_padt      | 88.26   | 88.24        | 87.76    | 83.14         | 85.34        |
| ar_pud       |         |              | 36.33    | 34.28         | 36.08        |
| be_hse       | 82.83   | 74.03        | 87.52    | 59.16         | 81.82        |
| bg_btb       | 97.54   | 97.58        | 97.47    | 91.41         | 95.4         |
| ca_ancora    | 98.37   | 98.21        | 98.28    | 96.04         | 97.67        |
| cs_cac       | 96.33   | 96.49        | 96.54    | 88.11         | 93.47        |
| cs_cltt      | 81.61   | 79.89        | 83.86    | 78.82         | 80.61        |
| cs_fictree   | 96.39   | 96.4         | 94.09    | 83.37         | 87.59        |
| cs_pdt       | 97.18   | 96.91        | 97.15    | 89.77         | 94.63        |
| cs_pud       |         |              | 93.88    | 87.44         | 91.81        |
| da_ddt       | 97.22   | 97.08        | 95.62    | 89.82         | 94.08        |
| de_gsd       | 90.84   | 90.58        | 90.4     | 80.69         | 88.99        |
| de_pud       |         |              | 30.41    | 30.55         | 30.4         |
| el_gdt       | 94.57   | 93.95        | 94.83    | 87.6          | 92.07        |
| en_gum       | 96.87   | 96           | 93.79    | 90.11         | 93.71        |
| en_lines     | 97.32   | 96.68        | 93.11    | 87.49         | 92.07        |
| en_partut    | 94.88   | 95.38        | 90.76    | 79.99         | 90.18        |
| en_pud       |         |              | 93.25    | 91.23         | 93.1         |
| es_ancora    | 98.45   | 98.42        | 97.6     | 95.17         | 97           |
| es_gsd       | 93.52   | 93.72        | 88.72    | 89.26         | 88.78        |
| es_pud       |         |              | 52.7     | 52.8          | 52.73        |
| et_edt       | 96.14   | 96.11        | 95.78    | 90.51         | 92.14        |
| eu_bdt       | 93.27   | 92.56        | 92.67    | 76.72         | 84.53        |
| fa_seraji    | 97.35   | 97.25        | 96.91    | 93.82         | 96.28        |
| fi_ftb       | 96.34   | 96.48        | 92.32    | 77.89         | 86.47        |
| fi_pud       |         |              | 93.58    | 91.12         | 91.65        |
| fi_tdt       | 95.03   | 95.58        | 90.96    | 88.44         | 87.48        |
| fr_gsd       | 96.05   | 96.11        | 94.67    | 86.97         | 94.51        |
| fr_partut    | 93.32   | 92.93        | 88.9     | 87.48         | 87.05        |
| fr_pud       |         |              | 59.15    | 57.5          | 58.94        |
| fr_sequoia   | 97.09   | 97.13        | 91.54    | 85.23         | 90.74        |
| fr_spoken    | 100     | 100          | 98.62    | 80.67         | 96.67        |
| ga_idt       | 82.2    | 81.78        | 81.2     | 63.44         | 66.82        |
| gl_ctg       | 98.98   | 98.95        | 95.27    | 89.98         | 95.1         |
| gl_treegal   |         |              | 80.05    | 68.73         | 75.97        |
| he_htb       | 81.27   | 80.85        | 80.79    | 76.89         | 78.74        |
| hi_hdtb      | 93.32   | 93.85        | 92.91    | 89.09         | 90.65        |
| hi_pud       |         |              | 22.1     | 22.37         | 22.03        |
| hr_set       | 91.99   | 91.85        | 91.24    | 81.62         | 87.81        |
| hu_szeged    | 93.65   | 91.28        | 92.93    | 71.25         | 87.36        |
| hy_armtdp    | 41.13   | 54.45        | 51.08    | 36.59         | 46.43        |
| id_gsd       | 94.84   | 96           | 94.85    | 91.62         | 94.39        |
| id_pud       |         |              | 39.83    | 42.79         | 39.79        |
| it_isdt      | 97.7    | 97.82        | 97.87    | 95.47         | 97.37        |
| it_partut    | 97.35   | 97.73        | 98.01    | 96.33         | 97.9         |

|                |       |       |       |       |       |
|----------------|-------|-------|-------|-------|-------|
| it_postwita    | 95.62 | 96.05 | 95.03 | 91.52 | 93.17 |
| it_pud         |       |       | 57.82 | 57.41 | 57.6  |
| ja_gsd         | 90.29 | 90.45 | 90.29 | 90.39 | 90.41 |
| ja_modern      |       |       | 63.9  | 61.17 | 63.99 |
| ja_pud         |       |       | 57.4  | 57.26 | 57.27 |
| kk_ktb         |       |       | 64.6  | 25.55 | 59.49 |
| ko_gsd         | 99.62 | 99.55 | 99.4  | 98.99 | 99.37 |
| ko_kaist       | 100   | 100   | 99.94 | 99.24 | 99.93 |
| ko_pud         |       |       | 38.33 | 38.66 | 38.27 |
| la_ittb        | 96.7  | 96.94 | 97.15 | 90.78 | 93.91 |
| la_perseus     |       |       | 82.09 | 64.73 | 72.24 |
| la_proiel      | 90.82 | 91.01 | 91.51 | 79.08 | 83.99 |
| lt_hse         | 75.21 | 69.65 | 73.61 | 42.51 | 65.22 |
| lv_lvtb        | 88.61 | 91.34 | 88.1  | 79.11 | 81.91 |
| mr_ufal        | 63.95 | 59.11 | 64.2  | 33.63 | 54.01 |
| nl_alpino      | 96.22 | 96.13 | 96.53 | 91.9  | 95.67 |
| nl_lassysmall  | 96.46 | 96.02 | 95.55 | 92.16 | 95.28 |
| no_bokmaal     | 96.85 | 97.13 | 96.48 | 91.17 | 95.31 |
| no_nynorskliia |       |       | 94.22 | 89.56 | 91.08 |
| no_nynorsk     | 96.7  | 97.04 | 96.49 | 92.12 | 94.79 |
| pl_lfg         | 95.85 | 94.68 | 84.96 | 47.99 | 84.56 |
| pl_sz          | 93.9  | 91.93 | 71.4  | 73.02 | 65.36 |
| pt_bosque      | 96.27 | 96.16 | 87.04 | 83.13 | 85.72 |
| pt_gsd         | 97.2  | 95.33 | 67.72 | 76.01 | 71.88 |
| pt_pud         |       |       | 52.06 | 49.79 | 50.95 |
| ro_nonstandard | 88.52 | 88.91 | 86.89 | 82.1  | 82.14 |
| ro_rrt         | 97.02 | 97.23 | 96.58 | 93.2  | 94.85 |
| ru_gsd         | 88.83 | 86.73 | 81.44 | 64.2  | 78.93 |
| ru_pud         |       |       | 37.97 | 35.26 | 37.49 |
| ru_syntagrus   | 97.02 | 96.9  | 95.99 | 91.96 | 94.33 |
| ru_taiga       |       |       | 88.56 | 84.02 | 86.01 |
| sa_ufal        |       |       | 15.9  | 16.14 | 16.33 |
| sk_snk         | 92.06 | 89.63 | 91.58 | 68.25 | 85.29 |
| sl_ssj         | 94.39 | 93.78 | 94.41 | 82.69 | 89.23 |
| sl_sst         | 88.46 |       | 91.89 | 78.22 | 85.59 |
| sr_set         | 94.83 | 94.71 | 92.79 | 73.51 | 90.48 |
| sv_lines       | 89.54 | 89.55 | 88.66 | 83.27 | 86.4  |
| sv_pud         |       |       | 77.39 | 73.94 | 76.79 |
| sv_talbanken   | 96.92 | 96.56 | 96.13 | 90.23 | 94.49 |
| ta_ttb         | 72.91 | 71.01 | 73.75 | 46.9  | 70.22 |
| te_mtg         | 98.96 | 98.96 | 98.54 | 98.68 | 98.54 |
| th_pud         |       |       | 8.27  | 0     | 8.43  |
| tl_trg         |       |       | 29.31 | 28.62 | 25.17 |
| tr_imst        | 89.5  | 91    | 88.63 | 73.23 | 81.99 |
| tr_pud         |       |       | 23.72 | 23.84 | 23.46 |
| uk_iu          | 92.4  | 90.98 | 92.64 | 79.49 | 88.79 |
| ur_udtb        | 82.24 | 83.72 | 82.64 | 81.89 | 82.48 |
| vi_vtb         | 83.74 | 84    | 83.93 | 83.58 | 83.94 |
| yo_ytb         |       |       | 58.78 | 86.82 | 61.88 |
| zh_cfl         |       |       | 46.55 | 43.55 | 45.73 |
| zh_gsd         | 87.64 | 88.38 | 88.31 | 87.05 | 88.5  |

|        |       |       |       |
|--------|-------|-------|-------|
| zh_hk  | 66.33 | 64.97 | 66.23 |
| zh_pud | 86.35 | 83.6  | 86.14 |

---

Table 9: Morphology F1 of all models.
